# Supplementary material for: The burden of vision loss in the Middle East and North Africa region, 1990–2019
Source: PubMed Central journal article supplement (PMC10521494; doi:10.1186/s13690-023-01188-y), 2023-09-26

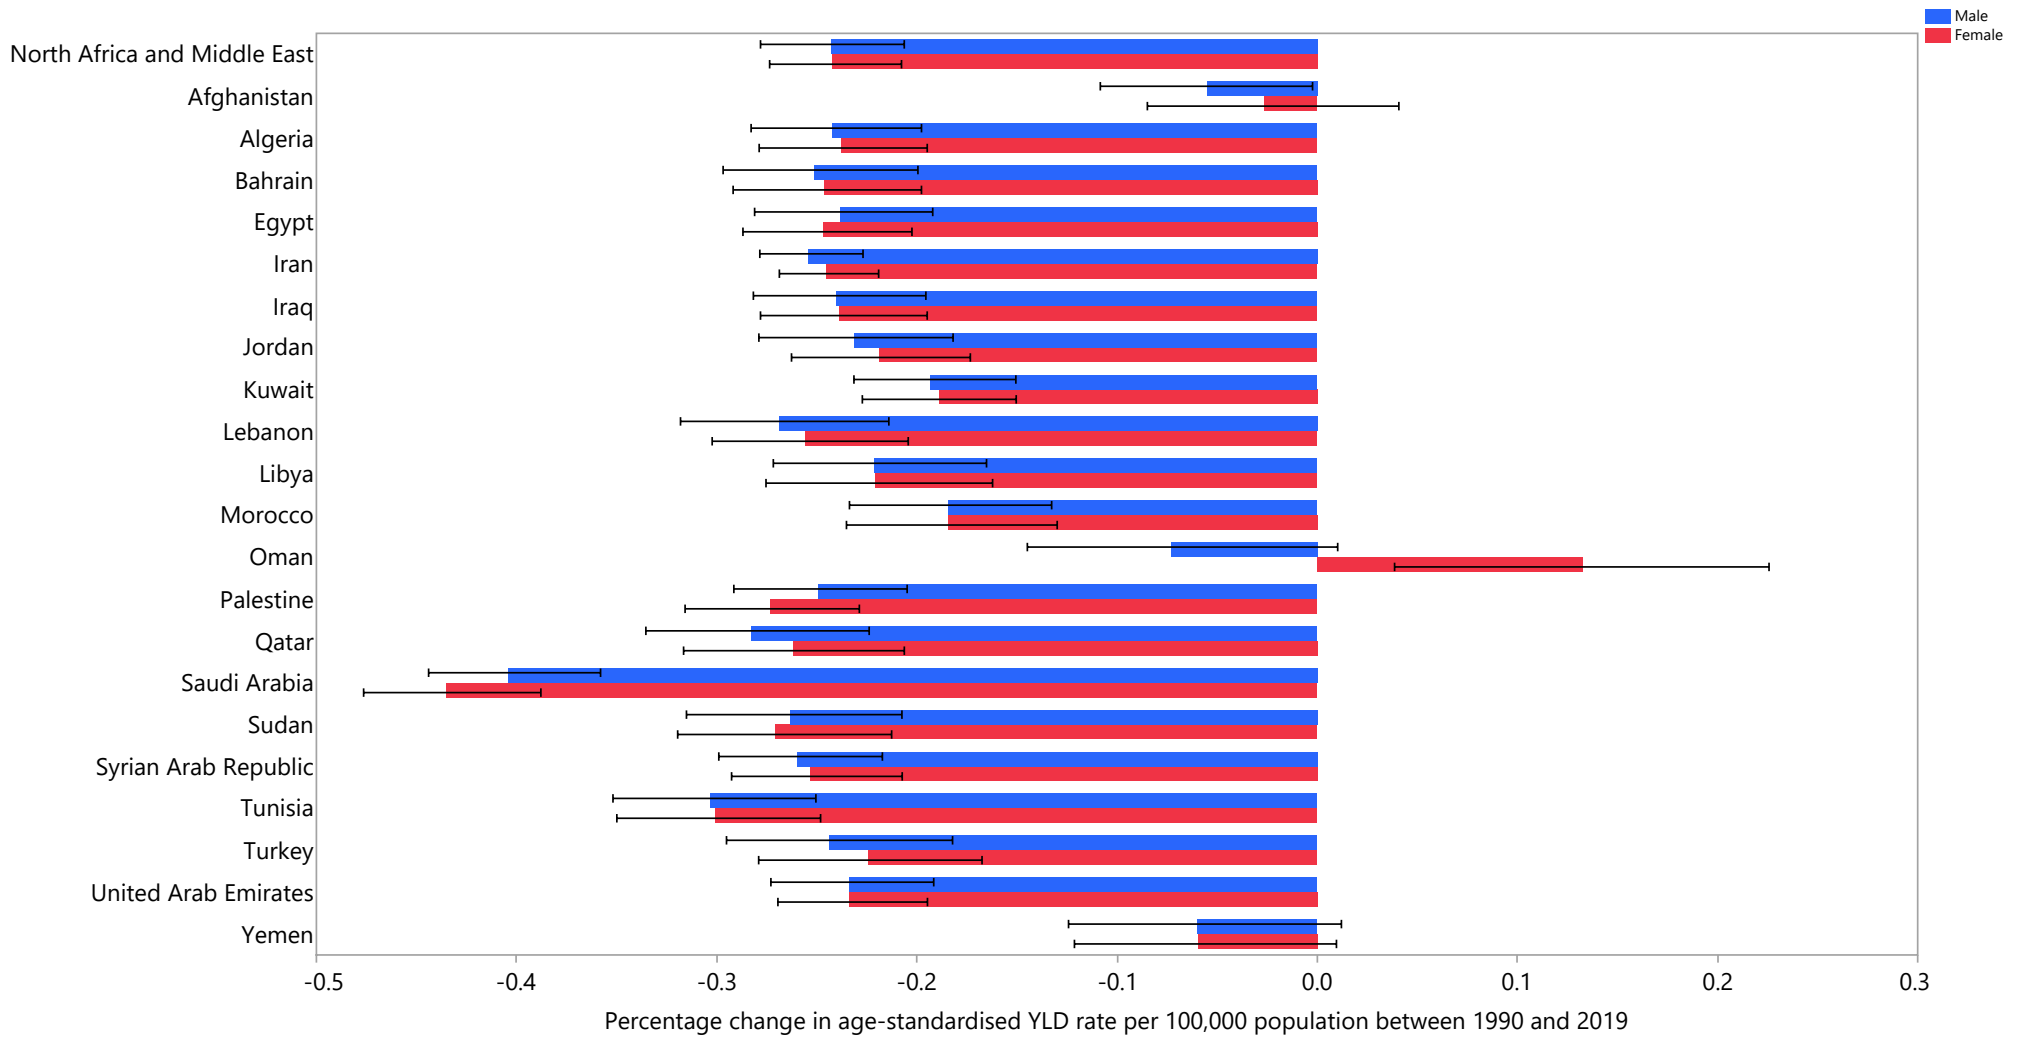

Supplement: 13690_2023_1188_MOESM5_ESM.pdf [file 13690_2023_1188_MOESM5_ESM.pdf]
